# Supplementary material for: Association of Sodium-Glucose Cotransporter-2 Inhibitors With Incident Atrial Fibrillation in Older Adults With Type 2 Diabetes
Source: PubMed Central journal article supplement (PMC9554705; doi:10.1001/jamanetworkopen.2022.35995), 2022-10-11
Supplement: jamanetwopen-e2235995-s001.pdf [file jamanetwopen-e2235995-s001.pdf]

## Supplementary Online Content

Zhuo M, D'Andrea E, Paik JM, et al. Association of sodium-glucose cotransporter-2 inhibitors with incident atrial fibrillation in older adults with type 2 diabetes. *JAMA Netw Open*. 2022;5(10):e2235995. doi:10.1001/jamanetworkopen.2022.35995

**eTable 1.** Definitions of Inclusion and Exclusion Criteria

**eTable 2.** Outcome Definitions

**eFigure 1.** Flowchart of Patients Included in SGLT-2i Versus DPP-4i Cohort

**eFigure 2.** Flowchart of Patients Included in SGLT-2i Versus GLP-1RA Cohort

**eTable 3.** Baseline Characteristics of SGLT-2i Versus DPP-4i Initiators Before and After 1:1 Propensity Score Matching

**eTable 4.** Baseline Characteristics of SGLT-2i Versus GLP-1RA Initiators Before and After 1:1 Propensity Score Matching

**eTable 5.** Reasons for Censoring in 1:1 Propensity Score–Matched Cohorts

**eTable 6.** Number of Events, Incidence Rate, Hazard Ratios for Sensitivity Analyses in 1:1 Propensity Score–Matched Cohorts

This supplementary material has been provided by the authors to give readers additional information about their work.

**eTable 1. Definitions of inclusion and exclusion criteria**

| <b>Criteria</b>                                   | <b>Codes</b>                                                                                                                                                                                                                                                                                                                                                                                                                                                                                                                                                                                                                                                                                                                                                                                                                                                                                                                                                                                                                    |
|---------------------------------------------------|---------------------------------------------------------------------------------------------------------------------------------------------------------------------------------------------------------------------------------------------------------------------------------------------------------------------------------------------------------------------------------------------------------------------------------------------------------------------------------------------------------------------------------------------------------------------------------------------------------------------------------------------------------------------------------------------------------------------------------------------------------------------------------------------------------------------------------------------------------------------------------------------------------------------------------------------------------------------------------------------------------------------------------|
| <b>Type 2 diabetes</b>                            | AF diagnosis code in any inpatient position or $\geq 2$ outpatient visits<br>ICD-9 diagnosis codes: 250.*0, 250.*2<br>ICD-10 diagnosis codes: E11.***                                                                                                                                                                                                                                                                                                                                                                                                                                                                                                                                                                                                                                                                                                                                                                                                                                                                           |
| <b>Type 1 diabetes</b>                            | ICD-9 diagnosis codes: 250.*1, 250.*3<br>ICD-10 diagnosis codes: E10.***                                                                                                                                                                                                                                                                                                                                                                                                                                                                                                                                                                                                                                                                                                                                                                                                                                                                                                                                                        |
| <b>Secondary diabetes</b>                         | ICD-9 diagnosis codes: 249.*<br>ICD-10 diagnosis codes: E08.***, E09.***, E13.***, O99.81*                                                                                                                                                                                                                                                                                                                                                                                                                                                                                                                                                                                                                                                                                                                                                                                                                                                                                                                                      |
| <b>Malignancy</b>                                 | ICD-9 diagnosis codes: 140.**-208.** (except 173.**)<br>ICD-10 diagnosis codes: C00.**-C96.** (except C44.**), D03.**, D45                                                                                                                                                                                                                                                                                                                                                                                                                                                                                                                                                                                                                                                                                                                                                                                                                                                                                                      |
| <b>Chronic kidney disease stage 5 or dialysis</b> | ICD-9 diagnosis codes: 585.5, 585.6, V45.1*, V56.1-V56.3*, V56.8<br>ICD-9 procedure codes: 39.95, 54.98<br>ICD-10 diagnosis codes: N18.5, N18.6, Z49.31, Z49.32, Z99.2<br>ICD-10 procedure codes: 3E1M39Z, 5A1D00Z, 5A1D60Z<br>CPT-4/HCPCS: 50360, 50365, 50380, 90920, 90921, 90924, 90925, 90935, 90937, 90940, 90945, 90947, 90957, 90958, 90959, 90960, 90961, 90962, 90965, 90966, 90969, 90970, 90989, 90993, 90999, 99512, 99559, G0257, G0314, G0315, G0316, G0317, G0318, G0319, G0322, G0323, G0326, G0327, S9335, S9339                                                                                                                                                                                                                                                                                                                                                                                                                                                                                              |
| <b>Organ transplant</b>                           | ICD-9 diagnosis codes: 996.8*, E878.0, V42.*, V58.44<br>ICD-9 procedure codes: 33.5*, 33.6, 37.51, 41.0*, 46.97, 50.5, 50.51, 50.59, 52.8*, 55.6*<br>ICD-10 diagnosis codes: T86.**, Z94.**, Y83.0, Z48.21, Z48.22, Z48.23, Z48.24, Z48.280, Z48.288, Z48.290, Z48.298<br>ICD-10 procedure codes: 02YA0Z0, 02YA0Z1, 02YA0Z2, 0BYC0Z0, 0BYC0Z1, 0BYC0Z2, 0BYD0Z0, 0BYD0Z1, 0BYD0Z2, 0BYF0Z0, 0BYF0Z1, 0BYF0Z2, 0BYG0Z0, 0BYG0Z1, 0BYG0Z2, 0BYH0Z0, 0BYH0Z1, 0BYH0Z2, 0BYJ0Z0, 0BYJ0Z1, 0BYJ0Z2, 0BYK0Z0, 0BYK0Z1, 0BYK0Z2, 0BYL0Z0, 0BYL0Z1, 0BYL0Z2, 0BYM0Z0, 0BYM0Z1, 0BYM0Z2, 0DY80Z0, 0DY80Z1, 0DY80Z2, 0DYE0Z0, 0DYE0Z1, 0DYE0Z2, 0FSG0ZZ, 0FSG4ZZ, 0FY00Z0, 0FY00Z1, 0FY00Z2, 0FYG0Z0, 0FYG0Z1, 0FYG0Z2, 0TS00ZZ, 0TS10ZZ, 0TY00Z0, 0TY00Z1, 0TY00Z2, 0TY10Z0, 0TY10Z1, 0TY10Z2, 30230AZ, 30230G0, 30230G2, 30230G3, 30230G4, 30230X0, 30230X2, 30230X3, 30230X4, 30230Y0, 30230Y2, 30230Y3, 30230Y4, 30233AZ, 30233G0, 30233G2, 30233G3, 30233G4, 30233X0, 30233X2, 30233X3, 30233X4, 30233Y0, 30233Y2, 30233Y3, 30233Y4, |

|                                                                             |                                                                                                                                                                                                                                                                                                                                                                                                                                                                                                                                                                                                                                                                                                                                                                                          |
|-----------------------------------------------------------------------------|------------------------------------------------------------------------------------------------------------------------------------------------------------------------------------------------------------------------------------------------------------------------------------------------------------------------------------------------------------------------------------------------------------------------------------------------------------------------------------------------------------------------------------------------------------------------------------------------------------------------------------------------------------------------------------------------------------------------------------------------------------------------------------------|
|                                                                             | <p>30240AZ, 30240G0, 30240G2, 30240G3, 30240G4, 30240X0, 30240X2, 30240X3, 30240X4, 30240Y0, 30240Y2, 30240Y3, 30240Y4, 30243AZ, 30243G0, 30243G2, 30243G3, 30243G4, 30243X0, 30243X2, 30243X3, 30243X4, 30243Y0, 30243Y2, 30243Y3, 30243Y4, 30250G0, 30250G1, 30250X0, 30250X1, 30250Y0, 30250Y1, 30253G0, 30253G1, 30253X0, 30253X1, 30253Y0, 30253Y1, 30260G0, 30260G1, 30260X0, 30260X1, 30260Y0, 30260Y1, 30263G0, 30263G1, 30263X0, 30263X1, 30263Y0, 30263Y1, 3E03005, 3E030U0, 3E030U1, 3E03305, 3E033U0, 3E033U1, 3E04005, 3E04305, 3E05005, 3E05305, 3E06005, 3E06305, 3E0J3U0, 3E0J3U1, 3E0J7U0, 3E0J7U1, 3E0J8U0, 3E0J8U1</p> <p>CPT-4/HCPCS: 32851-32854, 33935, 33945, 38240, 38241, 44135, 44136, 47135, 47136, 48554, 48556 CPT-4/HCPCS:, 50360, 50365, 50370, 50380</p> |
| <p><b>Prior atrial fibrillation or suspicion of atrial fibrillation</b></p> | <p>ICD-9 diagnosis codes: 427.3*</p> <p>ICD-9 procedure codes: 99.61, 99.62, 99.69</p> <p>ICD-10 diagnosis codes: I48.0, I48.1*, I48.2*, I48.3, I48.4, or I48.9*</p> <p>ICD-10 procedure codes: 02580ZZ, 5A2204Z</p> <p>CPT-4/HCPCS: 92960, 92961, 93651</p> <p>NDC medication: digoxin, amiodarone</p> <p>Any anticoagulant (enoxaparin, warfarin, fondaparinux, argatroban, bivalirudin, dabigatran, rivaroxaban, apixaban) AND any of the following medications: acebutolol, atenolol, betaxolol, bisoprolol, carteolol, esmolol, metoprolol, labetalol, penbutolol, nadolol, nebivolol, pindolol, propranolol, sotalol, carvedilol, diltiazem, verapamil)</p>                                                                                                                        |

**eTable 2. Outcome definitions**

| <b>Outcome</b>                                            | <b>Codes</b>                                                                                                                                                                                   |
|-----------------------------------------------------------|------------------------------------------------------------------------------------------------------------------------------------------------------------------------------------------------|
| <b>AF hospitalization</b>                                 | AF diagnosis code in any inpatient position.                                                                                                                                                   |
| <b>AF diagnosis</b>                                       | AF diagnosis code in any inpatient position or $\geq 2$ outpatient visits<br>ICD-9 codes: 427.3*<br>ICD-10 codes: I48.0, I48.1*, I48.2*, I48.3, I48.4, or I48.9*                               |
| <b>AF treated with medication</b>                         | AF diagnosis code in any inpatient or outpatient position combined with any AF medication (anticoagulant or antiarrhythmic) within 30 days.                                                    |
| <b>Hospitalization for AF</b>                             | AF discharge diagnosis codes in the primary position.                                                                                                                                          |
| <b>Stroke or transient ischemic attack (stroke/TIA)</b>   | Stroke or TIA discharge diagnosis codes in the primary position.<br>ICD-9 codes:<br>433.*1, 434.*1, 435.*, 436.*<br>ICD-10 codes:<br>I60.**, I61.*, I62.*, I63.*, G43.6*9, G45.*, G46.3, G46.4 |
| <b>Hospitalization for heart failure (HHF)</b>            | Heart failure discharge diagnosis codes in the primary position.<br>ICD-9 codes: 398.91, 402.*1, 404.*1, 404.*3, 428.**<br>ICD-10 codes: I09.81, I11.0, I13.0, I13.2, I50.**                   |
| <b>AF hospitalization censored for HF</b>                 | AF diagnosis code in any inpatient position censored for heart failure discharge diagnosis codes in the primary position.                                                                      |
| <b>Hospitalization for AF and heart failure (AF + HF)</b> | AF and heart failure discharge diagnosis codes in any position.                                                                                                                                |
| <b>Herpes zoster</b>                                      | Herpes zoster diagnosis code in any inpatient or outpatient position.<br>ICD-9 DX: 053.**<br>ICD-10 DX: B02.**                                                                                 |

Abbreviations: AF, atrial fibrillation; HF, heart failure.

**eFigure 1. Flowchart of patients included in SGLT-2i versus DPP-4i cohort.**

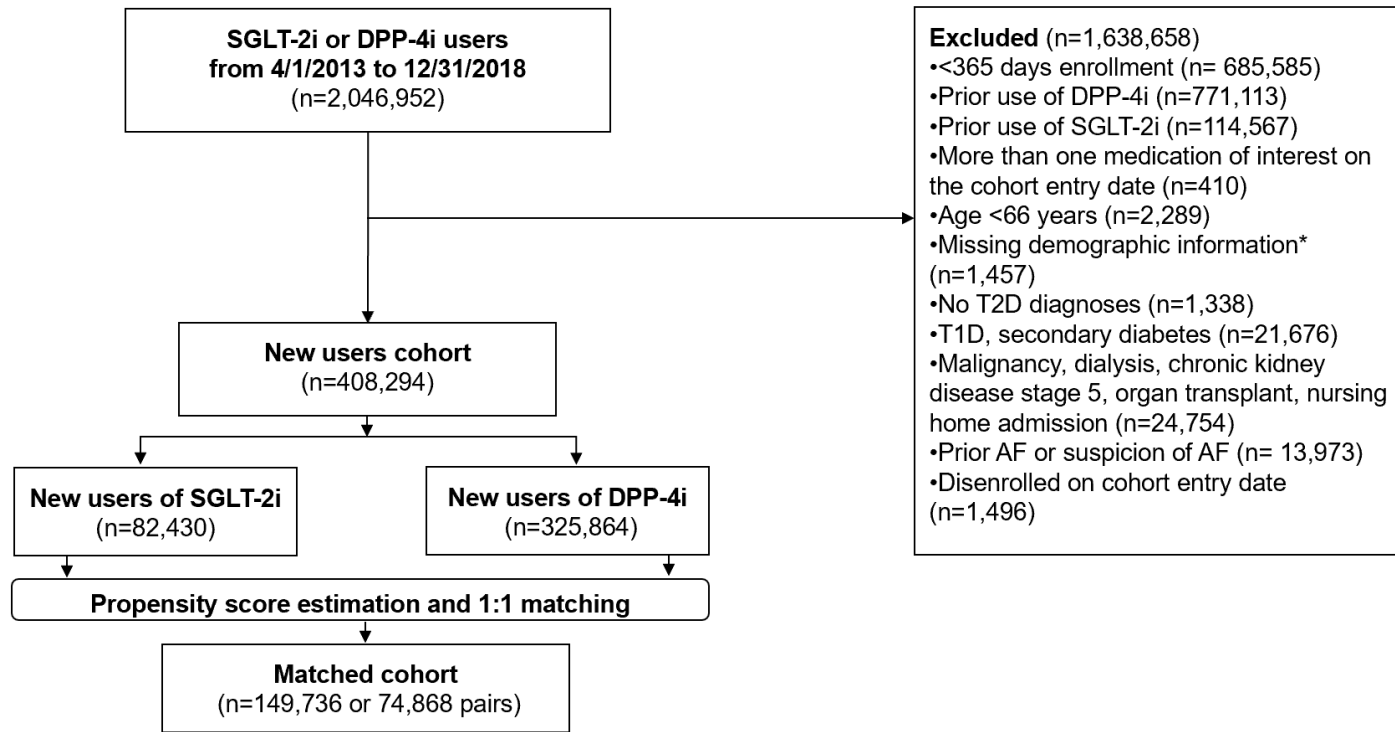

Abbreviations: SGLT-2i, sodium-glucose cotransporter-2 inhibitors; DPP-4i, dipeptidyl peptidase-4 inhibitors; T2D, type 2 diabetes; T1D, type 1 diabetes; AF, atrial fibrillation.

\*Demographic information includes age, gender, and race. A total of 1,457 patients with missing race information were excluded.

**eFigure 2. Flowchart of patients included in SGLT-2i versus GLP-1RA cohort.**

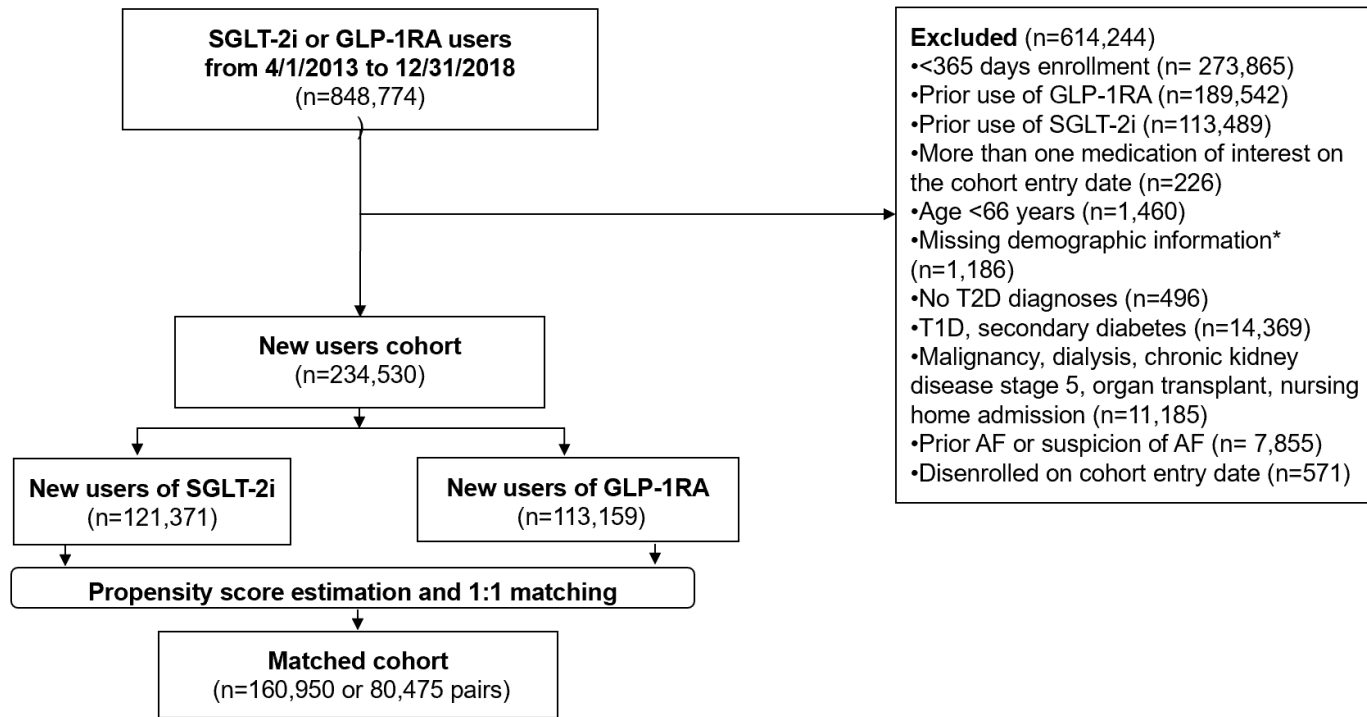

Abbreviations: SGLT-2i, sodium-glucose cotransporter-2 inhibitors; GLP-1RA, glucagon-like peptide-1 receptor agonist; T2D, type 2 diabetes; T1D, type 1 diabetes; AF, atrial fibrillation.

\*Demographic information includes age, gender, and race. A total of 1,186 patients with missing race information were excluded.

**eTable 3. Baseline characteristics of SGLT-2i versus DPP-4i initiators before and after 1:1 propensity score matching.**

| Characteristics                                             | Before matching                            |                                            |       | After matching                             |                                           |
|-------------------------------------------------------------|--------------------------------------------|--------------------------------------------|-------|--------------------------------------------|-------------------------------------------|
|                                                             | SGLT-2i<br>(n=82,430)<br>Patients, No. (%) | DPP-4i<br>(n=325,864)<br>Patients, No. (%) | St. D | SGLT-2i<br>(n=74,868)<br>Patients, No. (%) | DPP-4i<br>(n=74,868)<br>Patients, No. (%) |
| Age, mean (SD), years                                       | 71.6 (4.9)                                 | 74.2 (6.5)                                 | -0.45 | 71.85 (5.0)                                | 71.7 (5.1)                                |
| Male                                                        | 40,576 (49.2)                              | 136,293 (41.8)                             | 0.15  | 36,302 (48.5)                              | 36,398 (48.6)                             |
| Race                                                        |                                            |                                            |       |                                            |                                           |
| Black                                                       | 6,240 (7.6)                                | 36,951 (11.3)                              | -0.13 | 5,904 (7.9)                                | 5,985 (8.0)                               |
| White                                                       | 68,798 (83.5)                              | 242,347 (74.4)                             | 0.22  | 61,904 (82.7)                              | 61,794 (82.5)                             |
| Other <sup>a</sup>                                          | 7,392 (9.0)                                | 46,566 (14.3)                              | -0.17 | 7,060 (9.4)                                | 7,089 (9.5)                               |
| Region                                                      |                                            |                                            |       |                                            |                                           |
| Northeast                                                   | 13,960 (16.9)                              | 60,119 (18.4)                              | -0.04 | 12,737 (17.0)                              | 12,581 (16.8)                             |
| South                                                       | 36,575 (44.4)                              | 139,050 (42.7)                             | 0.03  | 33,231 (44.4)                              | 33,223 (44.4)                             |
| Midwest                                                     | 16,825 (20.4)                              | 66,741 (20.5)                              | 0.00  | 15,297 (20.4)                              | 15,405 (20.6)                             |
| West                                                        | 15,070 (18.3)                              | 59,954 (18.4)                              | 0.00  | 13,603 (18.2)                              | 13,659 (18.2)                             |
| Year of cohort entry                                        |                                            |                                            |       |                                            |                                           |
| 2013                                                        | 1,410 (1.7)                                | 45,779 (14.0)                              | -0.47 | 1,409 (1.9)                                | 1,249 (1.7)                               |
| 2014                                                        | 9,711 (11.8)                               | 67,628 (20.8)                              | -0.25 | 9,233 (12.3)                               | 8,922 (11.9)                              |
| 2015                                                        | 17,878 (21.7)                              | 65,401 (20.1)                              | 0.04  | 16,485 (22.0)                              | 16,430 (21.9)                             |
| 2016                                                        | 15,572 (18.9)                              | 54,115 (16.6)                              | 0.06  | 14,329 (19.1)                              | 14,480 (19.3)                             |
| 2017                                                        | 18,672 (22.7)                              | 49,235 (15.1)                              | 0.20  | 16,734 (22.4)                              | 16,903 (22.6)                             |
| 2018                                                        | 19,187 (23.3)                              | 43,706 (13.4)                              | 0.26  | 16,678 (22.3)                              | 16,884 (22.6)                             |
| <b>Diabetes related comorbidities</b>                       |                                            |                                            |       |                                            |                                           |
| Diabetic nephropathy <sup>b</sup>                           | 9,246 (11.2)                               | 45,357 (13.9)                              | -0.08 | 8,293 (11.1)                               | 8,333 (11.1)                              |
| Diabetic neuropathy <sup>c</sup>                            | 21,116 (25.6)                              | 73,995 (22.7)                              | 0.07  | 18,495 (24.7)                              | 18,420 (24.6)                             |
| Diabetic retinopathy <sup>d</sup>                           | 11,365 (13.8)                              | 39,415 (12.1)                              | 0.05  | 9,930 (13.3)                               | 9,816 (13.1)                              |
| Diabetes with other ophthalmic manifestation <sup>e</sup>   | 9,646 (11.7)                               | 44,826 (13.8)                              | -0.06 | 8,792 (11.7)                               | 8,698 (11.6)                              |
| Diabetes with peripheral circulatory disorders <sup>f</sup> | 2,559 (3.1)                                | 16,099 (4.9)                               | -0.09 | 2,373 (3.2)                                | 2,369 (3.2)                               |
| Diabetic foot <sup>g</sup>                                  | 2,086 (2.5)                                | 9,096 (2.8)                                | -0.02 | 1,890 (2.5)                                | 1,852 (2.5)                               |
| Osteomyelitis <sup>h</sup>                                  | 236 (0.3)                                  | 1,087 (0.3)                                | 0.00  | 220 (0.3)                                  | 230 (0.3)                                 |
| Lower extremity amputation <sup>i</sup>                     | 352 (0.4)                                  | 1,620 (0.5)                                | -0.01 | 323 (0.4)                                  | 328 (0.4)                                 |
| Erectile dysfunction <sup>j</sup>                           | 3,908 (4.7)                                | 10,683 (3.3)                               | 0.07  | 3,391 (4.5)                                | 3,452 (4.6)                               |

| Characteristics                                             | Before matching                            |                                            |       | After matching                             |                                           |
|-------------------------------------------------------------|--------------------------------------------|--------------------------------------------|-------|--------------------------------------------|-------------------------------------------|
|                                                             | SGLT-2i<br>(n=82,430)<br>Patients, No. (%) | DPP-4i<br>(n=325,864)<br>Patients, No. (%) | St. D | SGLT-2i<br>(n=74,868)<br>Patients, No. (%) | DPP-4i<br>(n=74,868)<br>Patients, No. (%) |
| Hyperglycemia <sup>k</sup>                                  | 29,827 (36.2)                              | 82,197 (25.2)                              | 0.24  | 25,879 (34.6)                              | 26,023 (34.8)                             |
| Hypoglycemia <sup>l</sup>                                   | 7,110 (8.6)                                | 26,168 (8.0)                               | 0.02  | 6,251 (8.3)                                | 6,126 (8.2)                               |
| Hyperosmolar hyperglycemic nonketotic syndrome <sup>m</sup> | 680 (0.8)                                  | 2,440 (0.7)                                | 0.01  | 598 (0.8)                                  | 606 (0.8)                                 |
| Diabetic ketoacidosis <sup>n</sup>                          | 184 (0.2)                                  | 1,128 (0.3)                                | -0.02 | 168 (0.2)                                  | 166 (0.2)                                 |
| Other diabetic complications <sup>o</sup>                   | 7,226 (8.8)                                | 23,464 (7.2)                               | 0.06  | 6,335 (8.5)                                | 6,252 (8.4)                               |
| <b>Other comorbid conditions</b>                            |                                            |                                            |       |                                            |                                           |
| Hyperthyroidism                                             | 862 (1.0)                                  | 4,310 (1.3)                                | -0.03 | 778 (1.0)                                  | 803 (1.1)                                 |
| Hypothyroidism                                              | 20,408 (24.8)                              | 81,385 (25.0)                              | 0.00  | 18,432 (24.6)                              | 18,330 (24.5)                             |
| Other disorders of thyroid gland                            | 6,342 (7.7)                                | 22,073 (6.8)                               | 0.03  | 5,513 (7.4)                                | 5,482 (7.3)                               |
| Chronic kidney disease stages 1-2                           | 3,114 (3.8)                                | 14,633 (4.5)                               | -0.04 | 2,817 (3.8)                                | 2,854 (3.8)                               |
| Chronic kidney disease stages 3-4                           | 6,214 (7.5)                                | 51,428 (15.8)                              | -0.26 | 5,896 (7.9)                                | 5,763 (7.7)                               |
| Chronic kidney disease stage unspecified                    | 3,392 (4.1)                                | 30,629 (9.4)                               | -0.21 | 3,245 (4.3)                                | 3,162 (4.2)                               |
| Acute kidney injury                                         | 1,882 (2.3)                                | 18,423 (5.7)                               | -0.17 | 1,795 (2.4)                                | 1,756 (2.3)                               |
| Hypertension                                                | 75,654 (91.8)                              | 301,344 (92.5)                             | -0.03 | 68,604 (91.6)                              | 68,639 (91.7)                             |
| Hyperlipidemia                                              | 71,451 (86.7)                              | 279,659 (85.8)                             | 0.03  | 64,592 (86.3)                              | 64,573 (86.2)                             |
| Stable angina                                               | 4,864 (5.9)                                | 17,338 (5.3)                               | 0.03  | 4,350 (5.8)                                | 4,244 (5.7)                               |
| Unstable angina                                             | 2,091 (2.5)                                | 8,168 (2.5)                                | 0.00  | 1,888 (2.5)                                | 1,875 (2.5)                               |
| Acute myocardial infarction                                 | 1,415 (1.7)                                | 6,474 (2.0)                                | -0.02 | 1,282 (1.7)                                | 1,298 (1.7)                               |
| Old myocardial infarction                                   | 3,671 (4.5)                                | 14,243 (4.4)                               | 0.00  | 3,297 (4.4)                                | 3,295 (4.4)                               |
| Coronary atherosclerosis                                    | 23,823 (28.9)                              | 92,224 (28.3)                              | 0.01  | 21,324 (28.5)                              | 21,302 (28.5)                             |
| History of coronary procedure                               | 8,182 (9.9)                                | 29,691 (9.1)                               | 0.03  | 7,260 (9.7)                                | 7,277 (9.7)                               |
| Cardiac conduction disorders <sup>p</sup>                   | 3,523 (4.3)                                | 15,882 (4.9)                               | -0.03 | 3,157 (4.2)                                | 3,173 (4.2)                               |
| Other cardiac dysrhythmia <sup>q</sup>                      | 7,900 (9.6)                                | 37,310 (11.4)                              | -0.06 | 7,227 (9.7)                                | 7,229 (9.7)                               |
| Cardiomyopathy                                              | 1,943 (2.4)                                | 8,824 (2.7)                                | -0.02 | 1,764 (2.4)                                | 1,732 (2.3)                               |
| Congestive heart failure                                    | 6,427 (7.8)                                | 33,744 (10.4)                              | -0.09 | 5,907 (7.9)                                | 5,865 (7.8)                               |
| Valve disorders                                             | 8,179 (9.9)                                | 38,140 (11.7)                              | -0.06 | 7,508 (10.0)                               | 7,449 (9.9)                               |
| Other cardiovascular disease <sup>r</sup>                   | 9,162 (11.1)                               | 35,307 (10.8)                              | 0.01  | 8,292 (11.1)                               | 8,237 (11.0)                              |
| Transient ischemic attack                                   | 1,866 (2.3)                                | 9,677 (3.0)                                | -0.04 | 1,710 (2.3)                                | 1,689 (2.3)                               |
| Ischemic stroke                                             | 8,446 (10.2)                               | 39,583 (12.1)                              | -0.06 | 7,730 (10.3)                               | 7,758 (10.4)                              |



| Characteristics                          | Before matching                            |                                            |       | After matching                             |                                           |
|------------------------------------------|--------------------------------------------|--------------------------------------------|-------|--------------------------------------------|-------------------------------------------|
|                                          | SGLT-2i<br>(n=82,430)<br>Patients, No. (%) | DPP-4i<br>(n=325,864)<br>Patients, No. (%) | St. D | SGLT-2i<br>(n=74,868)<br>Patients, No. (%) | DPP-4i<br>(n=74,868)<br>Patients, No. (%) |
| Hemorrhagic stroke                       | 131 (0.2)                                  | 818 (0.3)                                  | -0.02 | 122 (0.2)                                  | 126 (0.2)                                 |
| Peripheral artery disease                | 9,310 (11.3)                               | 44,833 (13.8)                              | -0.08 | 8,505 (11.4)                               | 8,531 (11.4)                              |
| Cerebrovascular procedure                | 182 (0.2)                                  | 780 (0.2)                                  | 0.00  | 160 (0.2)                                  | 171 (0.2)                                 |
| Atherosclerotic cerebrovascular disease  | 1,531 (1.9)                                | 8,917 (2.7)                                | -0.05 | 1,417 (1.9)                                | 1,402 (1.9)                               |
| Asthma                                   | 7,328 (8.9)                                | 29,113 (8.9)                               | 0.00  | 6,643 (8.9)                                | 6,763 (9.0)                               |
| Chronic obstructive pulmonary disease    | 9,217 (11.2)                               | 43,309 (13.3)                              | -0.06 | 8,543 (11.4)                               | 8,620 (11.5)                              |
| Obstructive sleep apnea                  | 13,220 (16.0)                              | 34,438 (10.6)                              | 0.16  | 11,257 (15.0)                              | 11,375 (15.2)                             |
| Pneumonia                                | 3,004 (3.6)                                | 16,165 (5.0)                               | -0.07 | 2,766 (3.7)                                | 2,710 (3.6)                               |
| Liver disease                            | 3,277 (4.0)                                | 13,614 (4.2)                               | -0.01 | 2,971 (4.0)                                | 2,984 (4.0)                               |
| Nonalcoholic fatty liver disease         | 4,345 (5.3)                                | 12,963 (4.0)                               | 0.06  | 3,814 (5.1)                                | 3,782 (5.1)                               |
| Osteoarthritis                           | 22,943 (27.8)                              | 89,115 (27.3)                              | 0.01  | 20,734 (27.7)                              | 20,679 (27.6)                             |
| Urinary tract infection                  | 11,823 (14.3)                              | 63,982 (19.6)                              | -0.14 | 10,966 (14.6)                              | 10,942 (14.6)                             |
| Kidney stone                             | 3,566 (4.3)                                | 13,473 (4.1)                               | 0.01  | 3,231 (4.3)                                | 3,258 (4.4)                               |
| Urinary stone                            | 225 (0.3)                                  | 903 (0.3)                                  | 0.00  | 205 (0.3)                                  | 197 (0.3)                                 |
| Hypertensive nephropathy                 | 4,470 (5.4)                                | 35,146 (10.8)                              | -0.20 | 4,218 (5.6)                                | 4,264 (5.7)                               |
| Proteinuria                              | 4,193 (5.1)                                | 18,312 (5.6)                               | -0.02 | 3,682 (4.9)                                | 3,688 (4.9)                               |
| Miscellaneous renal disease <sup>s</sup> | 7,026 (8.5)                                | 43,468 (13.3)                              | -0.15 | 6,551 (8.8)                                | 6,456 (8.6)                               |
| Electrolyte disorders                    | 5,028 (6.1)                                | 31,577 (9.7)                               | -0.13 | 4,691 (6.3)                                | 4,643 (6.2)                               |
| Edema                                    | 9,264 (11.2)                               | 41,807 (12.8)                              | -0.05 | 8,386 (11.2)                               | 8,361 (11.2)                              |
| Falls                                    | 3,375 (4.1)                                | 16,268 (5.0)                               | -0.04 | 3,080 (4.1)                                | 3,198 (4.3)                               |
| Fractures                                | 1,522 (1.8)                                | 6,779 (2.1)                                | -0.02 | 1,382 (1.8)                                | 1,358 (1.8)                               |
| Anxiety                                  | 9,861 (12.0)                               | 39,256 (12.0)                              | 0.00  | 9,014 (12.0)                               | 9,109 (12.2)                              |
| Depression                               | 12,308 (14.9)                              | 49,277 (15.1)                              | -0.01 | 11,148 (14.9)                              | 11,141 (14.9)                             |
| Psychosis                                | 690 (0.8)                                  | 5,768 (1.8)                                | -0.09 | 660 (0.9)                                  | 652 (0.9)                                 |
| Dementia                                 | 3,056 (3.7)                                | 23,878 (7.3)                               | -0.16 | 2,897 (3.9)                                | 2,823 (3.8)                               |
| Delirium                                 | 467 (0.6)                                  | 3,956 (1.2)                                | -0.06 | 450 (0.6)                                  | 422 (0.6)                                 |
| Sleep disorders                          | 8,510 (10.3)                               | 30,932 (9.5)                               | 0.03  | 7,602 (10.2)                               | 7,520 (10.0)                              |
| Alcohol abuse or dependence              | 933 (1.1)                                  | 3,849 (1.2)                                | -0.01 | 860 (1.1)                                  | 854 (1.1)                                 |
| Drug abuse or dependence                 | 1,290 (1.6)                                | 4,991 (1.5)                                | 0.01  | 1,160 (1.5)                                | 1,167 (1.6)                               |
| Smoking                                  | 15,937 (19.3)                              | 58,784 (18.0)                              | 0.03  | 14,434 (19.3)                              | 14,490 (19.4)                             |

| Characteristics                                | Before matching                            |                                            |       | After matching                             |                                           |
|------------------------------------------------|--------------------------------------------|--------------------------------------------|-------|--------------------------------------------|-------------------------------------------|
|                                                | SGLT-2i<br>(n=82,430)<br>Patients, No. (%) | DPP-4i<br>(n=325,864)<br>Patients, No. (%) | St. D | SGLT-2i<br>(n=74,868)<br>Patients, No. (%) | DPP-4i<br>(n=74,868)<br>Patients, No. (%) |
| Overweight <sup>t</sup>                        | 6,785 (8.2)                                | 23,164 (7.1)                               | 0.04  | 6,133 (8.2)                                | 6,311 (8.4)                               |
| Obesity <sup>u</sup>                           | 28,373 (34.4)                              | 75,834 (23.3)                              | 0.25  | 24,452 (32.7)                              | 24,383 (32.6)                             |
| Sepsis/systemic inflammatory response syndrome | 803 (1.0)                                  | 5,080 (1.6)                                | -0.05 | 760 (1.0)                                  | 778 (1.0)                                 |
| Claims-based frailty index                     |                                            |                                            |       |                                            |                                           |
| Non-frail                                      | 27,726 (33.6)                              | 91,412 (28.1)                              | 0.12  | 25,196 (33.7)                              | 25,506 (34.1)                             |
| Pre-frail                                      | 47,996 (58.2)                              | 190,650 (58.5)                             | -0.01 | 43,438 (58.0)                              | 43,094 (57.6)                             |
| Frail                                          | 6,708 (8.1)                                | 43,802 (13.4)                              | -0.17 | 6,234 (8.3)                                | 6,268 (8.4)                               |
| Combined comorbidity index (CCI), mean (SD)    | 1.0 (1.8)                                  | 1.4 (2.2)                                  | -0.03 | 1.0 (1.8)                                  | 1.0 (1.8)                                 |
| <b>Use of diabetes drugs</b>                   |                                            |                                            |       |                                            |                                           |
| Metformin                                      | 65,240 (79.1)                              | 244,730 (75.1)                             | 0.10  | 59,258 (79.1)                              | 59,503 (79.5)                             |
| Sulfonylureas                                  | 37,666 (45.7)                              | 156,966 (48.2)                             | -0.05 | 34,628 (46.3)                              | 34,814 (46.5)                             |
| Insulins                                       | 24,878 (30.2)                              | 51,343 (15.8)                              | 0.35  | 20,174 (26.9)                              | 20,112 (26.9)                             |
| GLP-1RA                                        | 15,355 (18.6)                              | 10,248 (3.1)                               | 0.51  | 8,686 (11.6)                               | 8,114 (10.8)                              |
| Glitazones                                     | 9,467 (11.5)                               | 29,658 (9.1)                               | 0.08  | 8,227 (11.0)                               | 8,213 (11.0)                              |
| Meglitinides                                   | 1,622 (2.0)                                | 6,525 (2.0)                                | 0.00  | 1,445 (1.9)                                | 1,450 (1.9)                               |
| Alpha glucosidase inhibitors                   | 618 (0.7)                                  | 2,265 (0.7)                                | 0.00  | 545 (0.7)                                  | 552 (0.7)                                 |
| Thiazolidinediones                             | 9,467 (11.5)                               | 29,658 (9.1)                               | 0.08  | 8,227 (11.0)                               | 8,213 (11.0)                              |
| Pramlintide                                    | 86 (0.1)                                   | 35 (0.0)                                   | 0.04  | 32 (0.0)                                   | 30 (0.0)                                  |
| Number of antidiabetic medications, mean (SD)  | 2.4 (0.9)                                  | 2.2 (0.8)                                  | 0.01  | 2.3 (0.9)                                  | 2.3 (0.8)                                 |
| <b>Other drugs</b>                             |                                            |                                            |       |                                            |                                           |
| Antiarrhythmics                                | 102 (0.1)                                  | 342 (0.1)                                  | 0.00  | 91 (0.1)                                   | 96 (0.1)                                  |
| Anticoagulants                                 | 871 (1.1)                                  | 3,487 (1.1)                                | 0.00  | 796 (1.1)                                  | 802 (1.1)                                 |
| Angiotensin converting enzyme inhibitors       | 37,886 (46.0)                              | 151,846 (46.6)                             | -0.01 | 34,519 (46.1)                              | 34,580 (46.2)                             |
| Angiotensin II receptor blockers               | 30,172 (36.6)                              | 114,663 (35.2)                             | 0.03  | 26,959 (36.0)                              | 26,801 (35.8)                             |
| Beta blockers                                  | 34,936 (42.4)                              | 143,120 (43.9)                             | -0.03 | 31,674 (42.3)                              | 31,645 (42.3)                             |
| Calcium channel blockers                       | 26,372 (32.0)                              | 118,969 (36.5)                             | -0.09 | 24,164 (32.3)                              | 23,959 (32.0)                             |
| Thiazide                                       | 13,137 (15.9)                              | 53,566 (16.4)                              | -0.01 | 11,922 (15.9)                              | 11,877 (15.9)                             |
| Loop diuretics                                 | 11,908 (14.4)                              | 55,928 (17.2)                              | -0.08 | 10,765 (14.4)                              | 10,697 (14.3)                             |
| Mineralocorticoid receptor antagonists         | 2,994 (3.6)                                | 11,617 (3.6)                               | 0.00  | 2,662 (3.6)                                | 2,674 (3.6)                               |
| Other potassium-sparing diuretics              | 2,323 (2.8)                                | 10,090 (3.1)                               | -0.02 | 2,146 (2.9)                                | 2,145 (2.9)                               |

| Characteristics                        | Before matching                            |                                            |       | After matching                             |                                           |
|----------------------------------------|--------------------------------------------|--------------------------------------------|-------|--------------------------------------------|-------------------------------------------|
|                                        | SGLT-2i<br>(n=82,430)<br>Patients, No. (%) | DPP-4i<br>(n=325,864)<br>Patients, No. (%) | St. D | SGLT-2i<br>(n=74,868)<br>Patients, No. (%) | DPP-4i<br>(n=74,868)<br>Patients, No. (%) |
| Other antihypertensive medications     | 5,933 (7.2)                                | 30,719 (9.4)                               | -0.08 | 5,467 (7.3)                                | 5,496 (7.3)                               |
| Sacubitril/valsartan                   | 96 (0.1)                                   | 207 (0.1)                                  | 0.00  | 81 (0.1)                                   | 90 (0.1)                                  |
| Nitrates and other antianginal agents  | 6,861 (8.3)                                | 28,859 (8.9)                               | -0.02 | 6,153 (8.2)                                | 6,172 (8.2)                               |
| Antiplatelet agents                    | 10,752 (13.0)                              | 46,113 (14.2)                              | -0.04 | 9,711 (13.0)                               | 9,777 (13.1)                              |
| Statins                                | 64,088 (77.7)                              | 245,786 (75.4)                             | 0.05  | 57,809 (77.2)                              | 57,683 (77.0)                             |
| Other lipid-lowering agents            | 15,143 (18.4)                              | 55,126 (16.9)                              | 0.04  | 13,397 (17.9)                              | 13,289 (17.7)                             |
| COPD/asthma medications                | 15,654 (19.0)                              | 62,231 (19.1)                              | 0.00  | 14,163 (18.9)                              | 14,264 (19.1)                             |
| NSAIDs                                 | 21,897 (26.6)                              | 86,377 (26.5)                              | 0.00  | 19,909 (26.6)                              | 19,929 (26.6)                             |
| Antiosteoporosis agents                | 3,768 (4.6)                                | 22,358 (6.9)                               | -0.10 | 3,551 (4.7)                                | 3,476 (4.6)                               |
| Benzodiazepines                        | 11,339 (13.8)                              | 45,922 (14.1)                              | -0.01 | 10,311 (13.8)                              | 10,322 (13.8)                             |
| Antidepressants                        | 23,959 (29.1)                              | 90,094 (27.6)                              | 0.03  | 21,512 (28.7)                              | 21,498 (28.7)                             |
| Anxiolytics/hypnotics                  | 6,391 (7.8)                                | 26,121 (8.0)                               | -0.01 | 5,816 (7.8)                                | 5,838 (7.8)                               |
| Corticosteroids                        | 13,692 (16.6)                              | 53,322 (16.4)                              | 0.01  | 12,478 (16.7)                              | 12,396 (16.6)                             |
| Dementia medications                   | 1,946 (2.4)                                | 17,070 (5.2)                               | -0.15 | 1,883 (2.5)                                | 1,847 (2.5)                               |
| Antiparkinsonian medications           | 2,945 (3.6)                                | 11,898 (3.7)                               | -0.01 | 2,659 (3.6)                                | 2,639 (3.5)                               |
| Antipsychotics                         | 1,875 (2.3)                                | 11,075 (3.4)                               | -0.07 | 1,741 (2.3)                                | 1,715 (2.3)                               |
| Opioids                                | 27,826 (33.8)                              | 110,934 (34.0)                             | 0.00  | 25,158 (33.6)                              | 25,157 (33.6)                             |
| Gabapentinoids                         | 14,528 (17.6)                              | 56,589 (17.4)                              | 0.01  | 13,069 (17.5)                              | 13,165 (17.6)                             |
| Number of total medications, mean (SD) | 12.8 (5.7)                                 | 12.5 (5.9)                                 | 0.05  | 12.6 (5.7)                                 | 12.6 (5.8)                                |
| <b>Health care utilization</b>         |                                            |                                            |       |                                            |                                           |
| Electrocardiogram                      | 36,873 (44.7)                              | 153,447 (47.1)                             | -0.05 | 33,390 (44.6)                              | 33,344 (44.5)                             |
| Cardiac imaging                        | 19,659 (23.8)                              | 82,183 (25.2)                              | -0.03 | 17,791 (23.8)                              | 17,702 (23.6)                             |
| Cardiovascular stress test             | 10,461 (12.7)                              | 37,860 (11.6)                              | 0.03  | 9,360 (12.5)                               | 9,247 (12.4)                              |
| Glucose test                           | 27,077 (32.8)                              | 106,659 (32.7)                             | 0.00  | 23,980 (32.0)                              | 24,042 (32.1)                             |
| HbA1c test order                       | 79,870 (96.9)                              | 310,554 (95.3)                             | 0.08  | 72,440 (96.8)                              | 72,426 (96.7)                             |
| Metabolic panel test                   | 79,193 (96.1)                              | 311,509 (95.6)                             | 0.03  | 71,881 (96.0)                              | 71,923 (96.1)                             |
| Pap smear                              | 4,547 (5.5)                                | 16,187 (5.0)                               | 0.02  | 4,091 (5.5)                                | 4,188 (5.6)                               |
| Prostate cancer screening              | 22,515 (27.3)                              | 72,399 (22.2)                              | 0.12  | 20,143 (26.9)                              | 20,338 (27.2)                             |
| Colorectal cancer screening            | 8,673 (10.5)                               | 29,326 (9.0)                               | 0.05  | 7,723 (10.3)                               | 7,708 (10.3)                              |
| Influenza vaccine                      | 51,017 (61.9)                              | 191,989 (58.9)                             | 0.06  | 45,884 (61.3)                              | 45,944 (61.4)                             |

| Characteristics                    | Before matching                            |                                            |       | After matching                             |                                           |
|------------------------------------|--------------------------------------------|--------------------------------------------|-------|--------------------------------------------|-------------------------------------------|
|                                    | SGLT-2i<br>(n=82,430)<br>Patients, No. (%) | DPP-4i<br>(n=325,864)<br>Patients, No. (%) | St. D | SGLT-2i<br>(n=74,868)<br>Patients, No. (%) | DPP-4i<br>(n=74,868)<br>Patients, No. (%) |
| Pneumococcal vaccine               | 17,106 (20.8)                              | 55,356 (17.0)                              | 0.10  | 15,332 (20.5)                              | 15,427 (20.6)                             |
| Emergency department visit         | 20,285 (24.6)                              | 100,665 (30.9)                             | -0.14 | 18,739 (25.0)                              | 18,740 (25.0)                             |
| Hospitalization                    | 7,637 (9.3)                                | 45,048 (13.8)                              | -0.14 | 7,113 (9.5)                                | 7,148 (9.5)                               |
| Internal medicine visit            | 73,207 (88.8)                              | 289,973 (89.0)                             | -0.01 | 66,533 (88.9)                              | 66,620 (89.0)                             |
| Cardiologist visit                 | 33,001 (40.0)                              | 133,133 (40.9)                             | -0.02 | 29,731 (39.7)                              | 29,597 (39.5)                             |
| Endocrinologist visit              | 17,574 (21.3)                              | 42,072 (12.9)                              | 0.22  | 13,832 (18.5)                              | 13,600 (18.2)                             |
| Nephrologist visit                 | 3,096 (3.8)                                | 28,206 (8.7)                               | -0.20 | 2,927 (3.9)                                | 2,958 (4.0)                               |
| Number of office visits, mean (SD) | 10.5 (7.1)                                 | 10.4 (7.5)                                 | 0.01  | 10.3 (7.1)                                 | 10.3 (7.3)                                |

Values are numbers (percentages) unless stated otherwise

All standardized differences in post-matching cohorts were less than 0.1

Abbreviations: SGLT-2i, sodium-glucose cotransporter-2 inhibitors; DPP-4i, dipeptidyl peptidase-4 inhibitors; St. D, standardized difference; SD, standard deviation; GLP-1RA, glucagon-like peptide-1 receptor agonist; COPD, chronic obstructive pulmonary disease; NSAIDs, nonsteroidal anti-inflammatory drugs; HbA1c, hemoglobin A1c

<sup>a</sup>Other: Asian, North American Native, Hispanic, and other (plus an unknown category).

<sup>b</sup>Diabetic nephropathy: diabetes with renal manifestations, diabetic nephropathy, et al.

<sup>c</sup>Diabetic neuropathy: diabetes with neurological manifestations, polyneuropathy in diabetes, diabetic polyneuropathy, et al.

<sup>d</sup>Diabetic retinopathy: diabetic retinopathy with or without macular edema, pan retinal photocoagulation, history of vitreous hemorrhage or vitrectomy, intravitreal anti-vascular endothelial growth factor injection, et al.

<sup>e</sup>Diabetes with other ophthalmic manifestation: diabetic cataract, diabetic glaucoma, retinal vein occlusion, age-related macular degeneration, et al.

<sup>f</sup>Diabetes with peripheral circulatory disorders: diabetic peripheral angiopathy without gangrene, diabetic peripheral angiopathy with gangrene, type 2 diabetes mellitus with other circulatory complications, et al.

<sup>g</sup>Diabetic foot: type 2 diabetes mellitus with foot ulcer, non-pressure chronic ulcer of calf, non-pressure chronic ulcer of ankle, non-pressure chronic ulcer of heel, et al.

<sup>h</sup>Osteomyelitis: acute hematogenous osteomyelitis, subacute osteomyelitis, chronic osteomyelitis, et al.

<sup>i</sup>Lower extremity amputation: ankle amputation, foot amputation, below knee amputation, above knee amputation, acquired absence of foot, acquired absence of ankle, acquired absence of leg below knee, acquired absence of leg above knee, et al.

<sup>j</sup>Erectile dysfunction: erectile dysfunction due to arterial insufficiency, unspecified male erectile dysfunction, et al.

<sup>k</sup>Hyperglycemia: type 2 diabetes mellitus with hyperglycemia, unspecified hyperglycemia, et al.

<sup>l</sup>Hypoglycemia: hypoglycemia with coma, hypoglycemia without coma, drug-induced hypoglycemia, et al.

<sup>m</sup>Hyperosmolar hyperglycemic nonketotic syndrome: diabetes with hyperosmolarity, diabetes with hyperosmolarity with coma, et al.

<sup>n</sup>Diabetic ketoacidosis: diabetes with ketoacidosis with coma, diabetes with ketoacidosis without coma, et al.

<sup>o</sup>Other diabetic complications: diabetes with unspecified complication

<sup>p</sup>Cardiac conduction disorders: atrioventricular block, left bundle branch block, right bundle branch block, et al.

<sup>q</sup>Other cardiac arrhythmia: ventricular tachycardia, premature beats, et al.

<sup>r</sup>Other cardiac vascular disease: rheumatic heart disease, pericarditis, myocarditis, et al.

<sup>s</sup>Miscellaneous renal insufficiency: gouty nephropathy, nephrotic syndrome, vesicoureteral reflex, et al.

<sup>t</sup>Overweight: body mass index 25.0-29.9

<sup>u</sup>Obesity: morbid obesity due to excess calories, gastric restrictive procedure, insertion of gastric bubble, body mass index 30.0-69.9, body mass index 70 and over, et al.

**eTable 4. Baseline characteristics of SGLT-2i versus GLP-1RA initiators before and after 1:1 propensity score matching.**

| Characteristics                                             | Before matching                             |                                              |       | After matching                             |                                             |
|-------------------------------------------------------------|---------------------------------------------|----------------------------------------------|-------|--------------------------------------------|---------------------------------------------|
|                                                             | SGLT-2i<br>(n=121,371)<br>Patients, No. (%) | GLP-1 RA<br>(n=113,159)<br>Patients, No. (%) | St. D | SGLT-2i<br>(n=80,475)<br>Patients, No. (%) | GLP-1 RA<br>(n=80,475)<br>Patients, No. (%) |
| Age, mean (SD), years                                       | 72.2 (5.3)                                  | 71.7 (5.0)                                   | 0.10  | 71.8 (5.1)                                 | 71.8 (5.1)                                  |
| Male                                                        | 58,808 (48.5)                               | 47,650 (42.1)                                | 0.13  | 35,977 (44.7)                              | 36,025 (44.8)                               |
| Race                                                        |                                             |                                              |       |                                            |                                             |
| Black                                                       | 9,484 (7.8)                                 | 9,792 (8.7)                                  | -0.03 | 6,581 (8.2)                                | 6,616 (8.2)                                 |
| White                                                       | 96,435 (79.5)                               | 94,426 (83.4)                                | -0.10 | 66,883 (83.1)                              | 66,583 (82.7)                               |
| Other <sup>a</sup>                                          | 15,452 (12.7)                               | 8,941 (7.9)                                  | 0.16  | 7,011 (8.7)                                | 7,276 (9.0)                                 |
| Region                                                      |                                             |                                              |       |                                            |                                             |
| Northeast                                                   | 23,044 (19.0)                               | 18,396 (16.3)                                | 0.07  | 13,693 (17.0)                              | 13,803 (17.2)                               |
| South                                                       | 51,557 (42.5)                               | 48,735 (43.1)                                | -0.01 | 35,018 (43.5)                              | 34,958 (43.4)                               |
| Midwest                                                     | 23,298 (19.2)                               | 25,570 (22.6)                                | -0.08 | 17,179 (21.3)                              | 17,091 (21.2)                               |
| West                                                        | 23,472 (19.3)                               | 20,458 (18.1)                                | 0.03  | 14,585 (18.1)                              | 14,623 (18.2)                               |
| Year of cohort entry                                        |                                             |                                              |       |                                            |                                             |
| 2013                                                        | 2,373 (2.0)                                 | 9,961 (8.8)                                  | -0.30 | 2,372 (2.9)                                | 2,543 (3.2)                                 |
| 2014                                                        | 15,544 (12.8)                               | 14,788 (13.1)                                | -0.01 | 11,221 (13.9)                              | 11,193 (13.9)                               |
| 2015                                                        | 27,362 (22.5)                               | 17,086 (15.1)                                | 0.19  | 14,529 (18.1)                              | 14,727 (18.3)                               |
| 2016                                                        | 23,680 (19.5)                               | 18,609 (16.4)                                | 0.08  | 14,818 (18.4)                              | 14,832 (18.4)                               |
| 2017                                                        | 26,709 (22.0)                               | 22,980 (20.3)                                | 0.04  | 17,479 (21.7)                              | 17,443 (21.7)                               |
| 2018                                                        | 25,703 (21.2)                               | 29,735 (26.3)                                | -0.12 | 20,056 (24.9)                              | 19,737 (24.5)                               |
| <b>Diabetes related comorbidities</b>                       |                                             |                                              |       |                                            |                                             |
| Diabetic nephropathy <sup>b</sup>                           | 13,523 (11.1)                               | 21,798 (19.3)                                | -0.23 | 10,960 (13.6)                              | 11,044 (13.7)                               |
| Diabetic neuropathy <sup>c</sup>                            | 29,917 (24.6)                               | 34,768 (30.7)                                | -0.14 | 21,951 (27.3)                              | 21,972 (27.3)                               |
| Diabetic retinopathy <sup>d</sup>                           | 16,363 (13.5)                               | 18,387 (16.2)                                | -0.08 | 11,586 (14.4)                              | 11,656 (14.5)                               |
| Diabetes with other ophthalmic manifestation <sup>e</sup>   | 14,862 (12.2)                               | 14,493 (12.8)                                | -0.02 | 9,720 (12.1)                               | 9,806 (12.2)                                |
| Diabetes with peripheral circulatory disorders <sup>f</sup> | 4,369 (3.6)                                 | 4,112 (3.6)                                  | 0.00  | 2,646 (3.3)                                | 2,743 (3.4)                                 |
| Diabetic foot <sup>g</sup>                                  | 2,852 (2.3)                                 | 3,857 (3.4)                                  | -0.07 | 2,199 (2.7)                                | 2,174 (2.7)                                 |
| Osteomyelitis <sup>h</sup>                                  | 338 (0.3)                                   | 432 (0.4)                                    | -0.02 | 253 (0.3)                                  | 247 (0.3)                                   |
| Lower extremity amputation <sup>i</sup>                     | 466 (0.4)                                   | 746 (0.7)                                    | -0.04 | 382 (0.5)                                  | 389 (0.5)                                   |
| Erectile dysfunction <sup>j</sup>                           | 5,452 (4.5)                                 | 4,657 (4.1)                                  | 0.02  | 3,458 (4.3)                                | 3,492 (4.3)                                 |

| Characteristics                                             | Before matching                             |                                              |       | After matching                             |                                             |
|-------------------------------------------------------------|---------------------------------------------|----------------------------------------------|-------|--------------------------------------------|---------------------------------------------|
|                                                             | SGLT-2i<br>(n=121,371)<br>Patients, No. (%) | GLP-1 RA<br>(n=113,159)<br>Patients, No. (%) | St. D | SGLT-2i<br>(n=80,475)<br>Patients, No. (%) | GLP-1 RA<br>(n=80,475)<br>Patients, No. (%) |
| Hyperglycemia <sup>k</sup>                                  | 41,710 (34.4)                               | 44,522 (39.3)                                | -0.10 | 30,568 (38.0)                              | 30,289 (37.6)                               |
| Hypoglycemia <sup>l</sup>                                   | 9,931 (8.2)                                 | 11,511 (10.2)                                | -0.07 | 7,230 (9.0)                                | 7,212 (9.0)                                 |
| Hyperosmolar hyperglycemic nonketotic syndrome <sup>m</sup> | 996 (0.8)                                   | 1,115 (1.0)                                  | -0.02 | 713 (0.9)                                  | 708 (0.9)                                   |
| Diabetic ketoacidosis <sup>n</sup>                          | 273 (0.2)                                   | 326 (0.3)                                    | -0.02 | 193 (0.2)                                  | 184 (0.2)                                   |
| Other diabetic complications <sup>o</sup>                   | 10,152 (8.4)                                | 11,814 (10.4)                                | -0.07 | 7,509 (9.3)                                | 7,528 (9.4)                                 |
| <b>Other comorbid conditions</b>                            |                                             |                                              |       |                                            |                                             |
| Hyperthyroidism                                             | 1,368 (1.1)                                 | 1,275 (1.1)                                  | 0.00  | 905 (1.1)                                  | 916 (1.1)                                   |
| Hypothyroidism                                              | 29,471 (24.3)                               | 30,570 (27.0)                                | -0.06 | 20,777 (25.8)                              | 20,852 (25.9)                               |
| Other disorders of thyroid gland                            | 9,051 (7.5)                                 | 9,971 (8.8)                                  | -0.05 | 6,657 (8.3)                                | 6,620 (8.2)                                 |
| Chronic kidney disease stages 1-2                           | 4,672 (3.8)                                 | 5,703 (5.0)                                  | -0.06 | 3,393 (4.2)                                | 3,449 (4.3)                                 |
| Chronic kidney disease stages 3-4                           | 9,357 (7.7)                                 | 20,665 (18.3)                                | -0.32 | 8,636 (10.7)                               | 8,780 (10.9)                                |
| Chronic kidney disease stage unspecified                    | 5,183 (4.3)                                 | 10,496 (9.3)                                 | -0.20 | 4,558 (5.7)                                | 4,627 (5.7)                                 |
| Acute kidney injury                                         | 2,867 (2.4)                                 | 5,353 (4.7)                                  | -0.12 | 2,428 (3.0)                                | 2,452 (3.0)                                 |
| Hypertension                                                | 111,490 (91.9)                              | 105,577 (93.3)                               | -0.05 | 74,383 (92.4)                              | 74,397 (92.4)                               |
| Hyperlipidemia                                              | 105,538 (87.0)                              | 98,518 (87.1)                                | 0.00  | 69,568 (86.4)                              | 69,714 (86.6)                               |
| Stable angina                                               | 7,161 (5.9)                                 | 6,784 (6.0)                                  | 0.00  | 4,701 (5.8)                                | 4,711 (5.9)                                 |
| Unstable angina                                             | 2,881 (2.4)                                 | 2,855 (2.5)                                  | -0.01 | 1,982 (2.5)                                | 1,956 (2.4)                                 |
| Acute myocardial infarction                                 | 1,960 (1.6)                                 | 1,898 (1.7)                                  | -0.01 | 1,293 (1.6)                                | 1,292 (1.6)                                 |
| Old myocardial infarction                                   | 5,009 (4.1)                                 | 5,261 (4.6)                                  | -0.02 | 3,501 (4.4)                                | 3,521 (4.4)                                 |
| Coronary atherosclerosis                                    | 34,227 (28.2)                               | 33,412 (29.5)                                | -0.03 | 22,927 (28.5)                              | 22,827 (28.4)                               |
| History of coronary procedure                               | 11,199 (9.2)                                | 11,336 (10.0)                                | -0.03 | 7,661 (9.5)                                | 7,604 (9.4)                                 |
| Cardiac conduction disorders <sup>p</sup>                   | 4,956 (4.1)                                 | 5,398 (4.8)                                  | -0.03 | 3,494 (4.3)                                | 3,537 (4.4)                                 |
| Other cardiac dysrhythmia <sup>q</sup>                      | 11,492 (9.5)                                | 11,737 (10.4)                                | -0.03 | 7,904 (9.8)                                | 7,887 (9.8)                                 |
| Cardiomyopathy                                              | 2,765 (2.3)                                 | 3,024 (2.7)                                  | -0.03 | 1,943 (2.4)                                | 1,922 (2.4)                                 |
| Congestive heart failure                                    | 9,253 (7.6)                                 | 11,834 (10.5)                                | -0.10 | 6,883 (8.6)                                | 6,864 (8.5)                                 |
| Valve disorders                                             | 12,346 (10.2)                               | 12,185 (10.8)                                | -0.02 | 8,240 (10.2)                               | 8,240 (10.2)                                |
| Other cardiovascular disease <sup>r</sup>                   | 12,978 (10.7)                               | 14,167 (12.5)                                | -0.06 | 9,262 (11.5)                               | 9,295 (11.6)                                |
| Transient ischemic attack                                   | 2,859 (2.4)                                 | 2,797 (2.5)                                  | -0.01 | 1,928 (2.4)                                | 1,917 (2.4)                                 |
| Ischemic stroke                                             | 12,924 (10.6)                               | 12,445 (11.0)                                | -0.01 | 8,509 (10.6)                               | 8,496 (10.6)                                |
| Hemorrhagic stroke                                          | 195 (0.2)                                   | 204 (0.2)                                    | 0.00  | 137 (0.2)                                  | 147 (0.2)                                   |

| Characteristics                          | Before matching                             |                                              |       | After matching                             |                                             |
|------------------------------------------|---------------------------------------------|----------------------------------------------|-------|--------------------------------------------|---------------------------------------------|
|                                          | SGLT-2i<br>(n=121,371)<br>Patients, No. (%) | GLP-1 RA<br>(n=113,159)<br>Patients, No. (%) | St. D | SGLT-2i<br>(n=80,475)<br>Patients, No. (%) | GLP-1 RA<br>(n=80,475)<br>Patients, No. (%) |
| Peripheral artery disease                | 14,689 (12.1)                               | 14,789 (13.1)                                | -0.03 | 9,841 (12.2)                               | 9,853 (12.2)                                |
| Cerebrovascular procedure                | 235 (0.2)                                   | 242 (0.2)                                    | 0.00  | 162 (0.2)                                  | 154 (0.2)                                   |
| Atherosclerotic cerebrovascular disease  | 2,360 (1.9)                                 | 2,502 (2.2)                                  | -0.02 | 1,619 (2.0)                                | 1,635 (2.0)                                 |
| Asthma                                   | 10,328 (8.5)                                | 11,666 (10.3)                                | -0.06 | 7,623 (9.5)                                | 7,687 (9.6)                                 |
| Chronic obstructive pulmonary disease    | 13,447 (11.1)                               | 15,047 (13.3)                                | -0.07 | 9,646 (12.0)                               | 9,629 (12.0)                                |
| Obstructive sleep apnea                  | 16,015 (13.2)                               | 22,563 (19.9)                                | -0.18 | 13,405 (16.7)                              | 13,478 (16.7)                               |
| Pneumonia                                | 4,380 (3.6)                                 | 5,109 (4.5)                                  | -0.05 | 3,232 (4.0)                                | 3,235 (4.0)                                 |
| Liver disease                            | 5,149 (4.2)                                 | 4,493 (4.0)                                  | 0.01  | 3,252 (4.0)                                | 3,247 (4.0)                                 |
| Nonalcoholic fatty liver disease         | 6,241 (5.1)                                 | 6,327 (5.6)                                  | -0.02 | 4,427 (5.5)                                | 4,436 (5.5)                                 |
| Osteoarthritis                           | 33,492 (27.6)                               | 35,439 (31.3)                                | -0.08 | 23,872 (29.7)                              | 23,914 (29.7)                               |
| Urinary tract infection                  | 18,336 (15.1)                               | 20,703 (18.3)                                | -0.09 | 13,304 (16.5)                              | 13,247 (16.5)                               |
| Kidney stone                             | 5,240 (4.3)                                 | 5,529 (4.9)                                  | -0.03 | 3,721 (4.6)                                | 3,679 (4.6)                                 |
| Urinary stone                            | 327 (0.3)                                   | 338 (0.3)                                    | 0.00  | 234 (0.3)                                  | 233 (0.3)                                   |
| Hypertensive nephropathy                 | 6,720 (5.5)                                 | 13,314 (11.8)                                | -0.23 | 5,741 (7.1)                                | 5,884 (7.3)                                 |
| Proteinuria                              | 5,918 (4.9)                                 | 8,516 (7.5)                                  | -0.11 | 4,548 (5.7)                                | 4,572 (5.7)                                 |
| Miscellaneous renal disease <sup>s</sup> | 10,667 (8.8)                                | 14,678 (13.0)                                | -0.14 | 8,219 (10.2)                               | 8,249 (10.3)                                |
| Electrolyte disorders                    | 7,569 (6.2)                                 | 9,399 (8.3)                                  | -0.08 | 5,469 (6.8)                                | 5,473 (6.8)                                 |
| Edema                                    | 13,186 (10.9)                               | 16,944 (15.0)                                | -0.12 | 10,020 (12.5)                              | 10,050 (12.5)                               |
| Falls                                    | 5,011 (4.1)                                 | 5,881 (5.2)                                  | -0.05 | 3,738 (4.6)                                | 3,760 (4.7)                                 |
| Fractures                                | 2,189 (1.8)                                 | 2,465 (2.2)                                  | -0.03 | 1,625 (2.0)                                | 1,604 (2.0)                                 |
| Anxiety                                  | 13,929 (11.5)                               | 14,994 (13.3)                                | -0.05 | 10,167 (12.6)                              | 10,192 (12.7)                               |
| Depression                               | 17,001 (14.0)                               | 21,035 (18.6)                                | -0.12 | 13,323 (16.6)                              | 13,354 (16.6)                               |
| Psychosis                                | 1,132 (0.9)                                 | 1,137 (1.0)                                  | -0.01 | 760 (0.9)                                  | 761 (0.9)                                   |
| Dementia                                 | 5,222 (4.3)                                 | 5,215 (4.6)                                  | -0.01 | 3,540 (4.4)                                | 3,466 (4.3)                                 |
| Delirium                                 | 747 (0.6)                                   | 1,004 (0.9)                                  | -0.03 | 567 (0.7)                                  | 552 (0.7)                                   |
| Sleep disorders                          | 11,730 (9.7)                                | 13,586 (12.0)                                | -0.07 | 8,807 (10.9)                               | 8,895 (11.1)                                |
| Alcohol abuse or dependence              | 1,343 (1.1)                                 | 1,085 (1.0)                                  | 0.01  | 832 (1.0)                                  | 815 (1.0)                                   |
| Drug abuse or dependence                 | 1,768 (1.5)                                 | 2,141 (1.9)                                  | -0.03 | 1,340 (1.7)                                | 1,354 (1.7)                                 |
| Smoking                                  | 21,949 (18.1)                               | 23,618 (20.9)                                | -0.07 | 15,914 (19.8)                              | 15,822 (19.7)                               |
| Overweight <sup>t</sup>                  | 10,395 (8.6)                                | 8,511 (7.5)                                  | 0.04  | 6,522 (8.1)                                | 6,483 (8.1)                                 |



| Characteristics                                | Before matching                             |                                              |       | After matching                             |                                             |
|------------------------------------------------|---------------------------------------------|----------------------------------------------|-------|--------------------------------------------|---------------------------------------------|
|                                                | SGLT-2i<br>(n=121,371)<br>Patients, No. (%) | GLP-1 RA<br>(n=113,159)<br>Patients, No. (%) | St. D | SGLT-2i<br>(n=80,475)<br>Patients, No. (%) | GLP-1 RA<br>(n=80,475)<br>Patients, No. (%) |
| Obesity <sup>u</sup>                           | 36,008 (29.7)                               | 47,069 (41.6)                                | -0.25 | 29,408 (36.5)                              | 29,319 (36.4)                               |
| Sepsis/systemic inflammatory response syndrome | 1,184 (1.0)                                 | 1,493 (1.3)                                  | -0.03 | 856 (1.1)                                  | 892 (1.1)                                   |
| Claims-based frailty index                     |                                             |                                              |       |                                            |                                             |
| Non-frail                                      | 41,161 (33.9)                               | 28,770 (25.4)                                | 0.19  | 23,802 (29.6)                              | 23,779 (29.5)                               |
| Pre-frail                                      | 69,975 (57.7)                               | 70,055 (61.9)                                | -0.09 | 48,716 (60.5)                              | 48,669 (60.5)                               |
| Frail                                          | 10,235 (8.4)                                | 14,334 (12.7)                                | -0.14 | 7,957 (9.9)                                | 8,027 (10.0)                                |
| Combined comorbidity index (CCI), mean (SD)    | 1.0 (1.8)                                   | 1.5 (2.0)                                    | -0.26 | 1.2 (1.9)                                  | 1.2 (1.9)                                   |
| <b>Use of diabetes drugs</b>                   |                                             |                                              |       |                                            |                                             |
| Metformin                                      | 98,097 (80.8)                               | 80,373 (71.0)                                | 0.23  | 61,810 (76.8)                              | 61,816 (76.8)                               |
| Sulfonylureas                                  | 61,481 (50.7)                               | 53,117 (46.9)                                | 0.08  | 39,270 (48.8)                              | 39,280 (48.8)                               |
| Insulins                                       | 27,179 (22.4)                               | 46,893 (41.4)                                | -0.42 | 25,194 (31.3)                              | 25,180 (31.3)                               |
| DPP-4i                                         | 52,562 (43.3)                               | 37,515 (33.2)                                | 0.21  | 29,216 (36.3)                              | 29,545 (36.7)                               |
| Glitazones                                     | 14,568 (12.0)                               | 12,592 (11.1)                                | 0.03  | 9,296 (11.6)                               | 9,368 (11.6)                                |
| Meglitinides                                   | 3,295 (2.7)                                 | 2,962 (2.6)                                  | 0.01  | 2,092 (2.6)                                | 2,093 (2.6)                                 |
| Alpha glucosidase inhibitors                   | 1,295 (1.1)                                 | 1,091 (1.0)                                  | 0.01  | 815 (1.0)                                  | 773 (1.0)                                   |
| Thiazolidinediones                             | 14,568 (12.0)                               | 12,592 (11.1)                                | 0.03  | 9,296 (11.6)                               | 9,368 (11.6)                                |
| Pramlintide                                    | 69 (0.1)                                    | 179 (0.2)                                    | -0.03 | 68 (0.1)                                   | 67 (0.1)                                    |
| Number of antidiabetic medications, mean (SD)  | 2.6 (1.0)                                   | 2.5 (1.0)                                    | 0.10  | 2.5 (1.0)                                  | 2.5 (1.0)                                   |
| <b>Other drugs</b>                             |                                             |                                              |       |                                            |                                             |
| Antiarrhythmics                                | 157 (0.1)                                   | 138 (0.1)                                    | 0.00  | 97 (0.1)                                   | 106 (0.1)                                   |
| Anticoagulants                                 | 1,160 (1.0)                                 | 1,384 (1.2)                                  | -0.02 | 879 (1.1)                                  | 875 (1.1)                                   |
| Angiotensin converting enzyme inhibitors       | 55,438 (45.7)                               | 52,356 (46.3)                                | -0.01 | 37,156 (46.2)                              | 37,080 (46.1)                               |
| Angiotensin II receptor blockers               | 45,540 (37.5)                               | 43,373 (38.3)                                | -0.02 | 30,279 (37.6)                              | 30,455 (37.8)                               |
| Beta blockers                                  | 51,284 (42.3)                               | 51,533 (45.5)                                | -0.06 | 35,054 (43.6)                              | 34,988 (43.5)                               |
| Calcium channel blockers                       | 39,955 (32.9)                               | 38,906 (34.4)                                | -0.03 | 26,754 (33.2)                              | 26,710 (33.2)                               |
| Thiazide                                       | 18,248 (15.0)                               | 19,891 (17.6)                                | -0.07 | 13,328 (16.6)                              | 13,329 (16.6)                               |
| Loop diuretics                                 | 16,154 (13.3)                               | 23,385 (20.7)                                | -0.20 | 12,985 (16.1)                              | 12,998 (16.2)                               |
| Mineralocorticoid receptor antagonists         | 3,848 (3.2)                                 | 5,424 (4.8)                                  | -0.08 | 3,091 (3.8)                                | 3,094 (3.8)                                 |
| Other potassium-sparing diuretics              | 3,307 (2.7)                                 | 3,598 (3.2)                                  | -0.03 | 2,457 (3.1)                                | 2,414 (3.0)                                 |
| Other antihypertensive medications             | 8,854 (7.3)                                 | 10,281 (9.1)                                 | -0.07 | 6,393 (7.9)                                | 6,354 (7.9)                                 |

| Characteristics                        | Before matching                             |                                              |       | After matching                             |                                             |
|----------------------------------------|---------------------------------------------|----------------------------------------------|-------|--------------------------------------------|---------------------------------------------|
|                                        | SGLT-2i<br>(n=121,371)<br>Patients, No. (%) | GLP-1 RA<br>(n=113,159)<br>Patients, No. (%) | St. D | SGLT-2i<br>(n=80,475)<br>Patients, No. (%) | GLP-1 RA<br>(n=80,475)<br>Patients, No. (%) |
| Sacubitril/valsartan                   | 161 (0.1)                                   | 129 (0.1)                                    | 0.00  | 95 (0.1)                                   | 92 (0.1)                                    |
| Nitrates and other antianginal agents  | 10,014 (8.3)                                | 10,317 (9.1)                                 | -0.03 | 6,781 (8.4)                                | 6,749 (8.4)                                 |
| Antiplatelet agents                    | 16,331 (13.5)                               | 15,475 (13.7)                                | -0.01 | 10,632 (13.2)                              | 10,646 (13.2)                               |
| Statins                                | 95,323 (78.5)                               | 89,497 (79.1)                                | -0.01 | 63,174 (78.5)                              | 63,169 (78.5)                               |
| Other lipid-lowering agents            | 23,517 (19.4)                               | 21,534 (19.0)                                | 0.01  | 15,164 (18.8)                              | 15,179 (18.9)                               |
| COPD/asthma medications                | 22,821 (18.8)                               | 24,791 (21.9)                                | -0.08 | 16,417 (20.4)                              | 16,481 (20.5)                               |
| NSAIDs                                 | 33,862 (27.9)                               | 31,080 (27.5)                                | 0.01  | 22,511 (28.0)                              | 22,456 (27.9)                               |
| Antiosteoporosis agents                | 7,232 (6.0)                                 | 5,717 (5.1)                                  | 0.04  | 4,139 (5.1)                                | 4,183 (5.2)                                 |
| Benzodiazepines                        | 16,211 (13.4)                               | 16,528 (14.6)                                | -0.03 | 11,447 (14.2)                              | 11,510 (14.3)                               |
| Antidepressants                        | 32,712 (27.0)                               | 39,347 (34.8)                                | -0.17 | 25,390 (31.6)                              | 25,417 (31.6)                               |
| Anxiolytics/hypnotics                  | 9,427 (7.8)                                 | 10,016 (8.9)                                 | -0.04 | 6,678 (8.3)                                | 6,695 (8.3)                                 |
| Corticosteroids                        | 19,087 (15.7)                               | 20,029 (17.7)                                | -0.05 | 13,624 (16.9)                              | 13,604 (16.9)                               |
| Dementia medications                   | 3,836 (3.2)                                 | 3,437 (3.0)                                  | 0.01  | 2,422 (3.0)                                | 2,377 (3.0)                                 |
| Antiparkinsonian medications           | 4,232 (3.5)                                 | 5,149 (4.6)                                  | -0.06 | 3,201 (4.0)                                | 3,230 (4.0)                                 |
| Antipsychotics                         | 2,976 (2.5)                                 | 3,238 (2.9)                                  | -0.02 | 2,195 (2.7)                                | 2,152 (2.7)                                 |
| Opioids                                | 39,350 (32.4)                               | 43,128 (38.1)                                | -0.12 | 28,539 (35.5)                              | 28,535 (35.5)                               |
| Gabapentinoids                         | 20,895 (17.2)                               | 24,659 (21.8)                                | -0.12 | 15,700 (19.5)                              | 15,630 (19.4)                               |
| Number of total medications, mean (SD) | 12.9 (5.9)                                  | 14.3 (6.1)                                   | -0.23 | 13.6 (6.1)                                 | 13.6 (5.8)                                  |
| <b>Health care utilization</b>         |                                             |                                              |       |                                            |                                             |
| Electrocardiogram                      | 54,545 (44.9)                               | 52,433 (46.3)                                | -0.03 | 36,342 (45.2)                              | 36,337 (45.2)                               |
| Cardiac imaging                        | 28,983 (23.9)                               | 29,131 (25.7)                                | -0.04 | 19,578 (24.3)                              | 19,620 (24.4)                               |
| Cardiovascular stress test             | 15,129 (12.5)                               | 15,008 (13.3)                                | -0.02 | 10,263 (12.8)                              | 10,246 (12.7)                               |
| Glucose test                           | 39,662 (32.7)                               | 40,988 (36.2)                                | -0.07 | 27,364 (34.0)                              | 27,409 (34.1)                               |
| HbA1c test order                       | 117,541 (96.8)                              | 109,914 (97.1)                               | -0.02 | 78,054 (97.0)                              | 78,042 (97.0)                               |
| Metabolic panel test                   | 116,848 (96.3)                              | 108,683 (96.0)                               | 0.02  | 77,204 (95.9)                              | 77,246 (96.0)                               |
| Pap smear                              | 6,613 (5.4)                                 | 6,651 (5.9)                                  | -0.02 | 4,698 (5.8)                                | 4,747 (5.9)                                 |
| Prostate cancer screening              | 33,182 (27.3)                               | 25,229 (22.3)                                | 0.12  | 19,486 (24.2)                              | 19,542 (24.3)                               |
| Colorectal cancer screening            | 12,134 (10.0)                               | 12,068 (10.7)                                | -0.02 | 8,435 (10.5)                               | 8,426 (10.5)                                |
| Influenza vaccine                      | 74,336 (61.2)                               | 71,535 (63.2)                                | -0.04 | 50,077 (62.2)                              | 50,203 (62.4)                               |
| Pneumococcal vaccine                   | 24,371 (20.1)                               | 23,241 (20.5)                                | -0.01 | 16,654 (20.7)                              | 16,714 (20.8)                               |

|                                    |                |                |       |               |               |
|------------------------------------|----------------|----------------|-------|---------------|---------------|
| Emergency department visit         | 29,627 (24.4)  | 32,325 (28.6)  | -0.10 | 21,157 (26.3) | 21,214 (26.4) |
| Hospitalization                    | 10,895 (9.0)   | 12,695 (11.2)  | -0.07 | 7,880 (9.8)   | 7,888 (9.8)   |
| Internal medicine visit            | 108,345 (89.3) | 100,613 (88.9) | 0.01  | 71,508 (88.9) | 71,537 (88.9) |
| Cardiologist visit                 | 47,681 (39.3)  | 47,956 (42.4)  | -0.06 | 32,550 (40.4) | 32,512 (40.4) |
| Endocrinologist visit              | 21,581 (17.8)  | 29,462 (26.0)  | -0.20 | 17,389 (21.6) | 17,450 (21.7) |
| Nephrologist visit                 | 4,631 (3.8)    | 11,178 (9.9)   | -0.24 | 4,199 (5.2)   | 4,376 (5.4)   |
| Number of office visits, mean (SD) | 10.4 (7.3)     | 11.8 (7.9)     | -0.18 | 11.0 (7.5)    | 11.0 (7.4)    |

Values are numbers (percentages) unless stated otherwise

All standardized differences in post-matching cohorts were less than 0.1

Abbreviations: SGLT-2i, sodium-glucose cotransporter-2 inhibitors; GLP-1RA, glucagon-like peptide-1 receptor agonist; St. D, standardized difference; SD, standard deviation; DPP-4i, dipeptidyl peptidase-4 inhibitors; COPD, chronic obstructive pulmonary disease; NSAIDs, nonsteroidal anti-inflammatory drugs; HbA1c, hemoglobin A1c

<sup>a</sup>Other: Asian, North American Native, Hispanic, and other (plus an unknown category).

<sup>b</sup>Diabetic nephropathy: diabetes with renal manifestations, diabetic nephropathy, et al.

<sup>c</sup>Diabetic neuropathy: diabetes with neurological manifestations, polyneuropathy in diabetes, diabetic polyneuropathy, et al.

<sup>d</sup>Diabetic retinopathy: diabetic retinopathy with or without macular edema, pan retinal photocoagulation, history of vitreous hemorrhage or vitrectomy, intravitreal anti-vascular endothelial growth factor injection, et al.

<sup>e</sup>Diabetes with other ophthalmic manifestation: diabetic cataract, diabetic glaucoma, retinal vein occlusion, age-related macular degeneration, et al.

<sup>f</sup>Diabetes with peripheral circulatory disorders: diabetic peripheral angiopathy without gangrene, diabetic peripheral angiopathy with gangrene, type 2 diabetes mellitus with other circulatory complications, et al.

<sup>g</sup>Diabetic foot: type 2 diabetes mellitus with foot ulcer, non-pressure chronic ulcer of calf, non-pressure chronic ulcer of ankle, non-pressure chronic ulcer of heel, et al.

<sup>h</sup>Osteomyelitis: acute hematogenous osteomyelitis, subacute osteomyelitis, chronic osteomyelitis, et al.

<sup>i</sup>Lower extremity amputation: ankle amputation, foot amputation, below knee amputation, above knee amputation, acquired absence of foot, acquired absence of ankle, acquired absence of leg below knee, acquired absence of leg above knee, et al.

<sup>j</sup>Erectile dysfunction: erectile dysfunction due to arterial insufficiency, unspecified male erectile dysfunction, et al.

<sup>k</sup>Hyperglycemia: type 2 diabetes mellitus with hyperglycemia, unspecified hyperglycemia, et al.

<sup>l</sup>Hypoglycemia: hypoglycemia with coma, hypoglycemia without coma, drug-induced hypoglycemia, et al.

<sup>m</sup>Hyperosmolar hyperglycemic nonketotic syndrome: diabetes with hyperosmolarity, diabetes with hyperosmolarity with coma, et al.

<sup>n</sup>Diabetic ketoacidosis: diabetes with ketoacidosis with coma, diabetes with ketoacidosis without coma, et al.

<sup>o</sup>Other diabetic complications: diabetes with unspecified complication

<sup>p</sup>Cardiac conduction disorders: atrioventricular block, left bundle branch block, right bundle branch block, et al.

<sup>q</sup>Other cardiac arrhythmia: ventricular tachycardia, premature beats, et al.

<sup>r</sup>Other cardiac vascular disease: rheumatic heart disease, pericarditis, myocarditis, et al.

<sup>s</sup>Miscellaneous renal insufficiency: gouty nephropathy, nephrotic syndrome, vesicoureteral reflex, et al.

<sup>t</sup>Overweight: body mass index 25.0-29.9

<sup>u</sup>Obesity: morbid obesity due to excess calories, gastric restrictive procedure, insertion of gastric bubble, body mass index 30.0-69.9, body mass index 70 and over, et al.

**eTable 5. Reasons for censoring in 1:1 propensity score–matched cohorts**

| Reasons for censoring                      | SGLT-2i versus DPP-4i<br>(n=74,868 pairs) |                             | SGLT-2i versus GLP-1RA<br>(n=80,475 pairs) |                              |
|--------------------------------------------|-------------------------------------------|-----------------------------|--------------------------------------------|------------------------------|
|                                            | SGLT-2i<br>Patients, No. (%)              | DPP-4i<br>Patients, No. (%) | SGLT-2i<br>Patients, No. (%)               | GLP-1RA<br>Patients, No. (%) |
| <b>Atrial fibrillation hospitalization</b> | 1,082 (1.4)                               | 1,410 (1.9)                 | 1,175 (1.4)                                | 1,235 (1.5)                  |
| <b>Death</b>                               | 580 (0.8)                                 | 935 (1.2)                   | 638 (0.8)                                  | 628 (0.8)                    |
| <b>Initiation of comparator medication</b> | 5,460 (7.3)                               | 4,171 (5.6)                 | 5,232 (6.5)                                | 4,357 (5.4)                  |
| <b>Discontinuation of index exposure</b>   | 44,188 (59.0)                             | 42,443 (56.7)               | 47,429 (58.9)                              | 47,970 (59.6)                |
| <b>End of study date</b>                   | 19,233 (25.7)                             | 20,930 (28.0)               | 21,358 (26.5)                              | 21,859 (27.2)                |
| <b>End of insurance enrollment</b>         | 4,325 (5.8)                               | 4,979 (6.7)                 | 4,643 (5.8)                                | 4,426 (5.5)                  |

Abbreviations: SGLT-2i, sodium-glucose cotransporter-2 inhibitors; DPP-4i, dipeptidyl peptidase-4 inhibitors; GLP-1RA, glucagon-like peptide-1 receptor agonist.

**eTable 6. Number of events, incidence rate, hazard ratios for sensitivity analyses in 1:1 propensity score–matched cohorts**

| <b>Sensitivity analyses for AF outcome</b> | <b>SGLT-2i</b>       | <b>DPP-4i</b>        | <b>SGLT-2i vs DPP-4i</b> | <b>SGLT-2i</b>       | <b>GLP-1RA</b>       | <b>SGLT-2i vs GLP-1RA</b> |
|--------------------------------------------|----------------------|----------------------|--------------------------|----------------------|----------------------|---------------------------|
|                                            | <b>N events (IR)</b> | <b>N events (IR)</b> | <b>HR (95% CI)</b>       | <b>N events (IR)</b> | <b>N events (IR)</b> | <b>HR (95% CI)</b>        |
| Grace period and risk period 30 days       | 818 (16.0)           | 1,088 (19.7)         | 0.81 (0.74, 0.89)        | 871 (17.5)           | 901 (16.3)           | 0.93 (0.84, 1.01)         |
| Grace period and risk period 90 days       | 1,244 (17.1)         | 1,626 (21.0)         | 0.82 (0.76, 0.88)        | 1,350 (17.4)         | 1,452 (19.2)         | 0.90 (0.84, 0.97)         |
| Intention-to-treat (ITT), No. (%)          | 1,088 (14.5)         | 1,268 (16.9)         | 0.86 (0.79, 0.93)        | 1,160 (14.4)         | 1,256 (15.6)         | 0.92 (0.85, 1.00)         |
| Herpes zoster                              | 827 (12.8)           | 887 (12.9)           | 0.99 (0.90, 1.09)        | 893 (12.9)           | 823 (12.5)           | 1.04 (0.94, 1.14)         |

Values are numbers (percentages) unless stated otherwise

Abbreviations: SGLT-2i, sodium-glucose cotransporter-2 inhibitors; DPP-4i, dipeptidyl peptidase-4 inhibitors; GLP-1RA, glucagon-like peptide-1 receptor agonist; AF, atrial fibrillation; N events, number of events; IR, incidence rate in 1000 patient years; HR, hazard ratio; CI, confidence interval.
